# Supplementary figures and images for: Tuning the self-organization of confined active particles by the steepness of the trap
Source: Royal Society of Chemistry journal article supplement (doi:10.1039/c9sm01691k), 2019-01-01

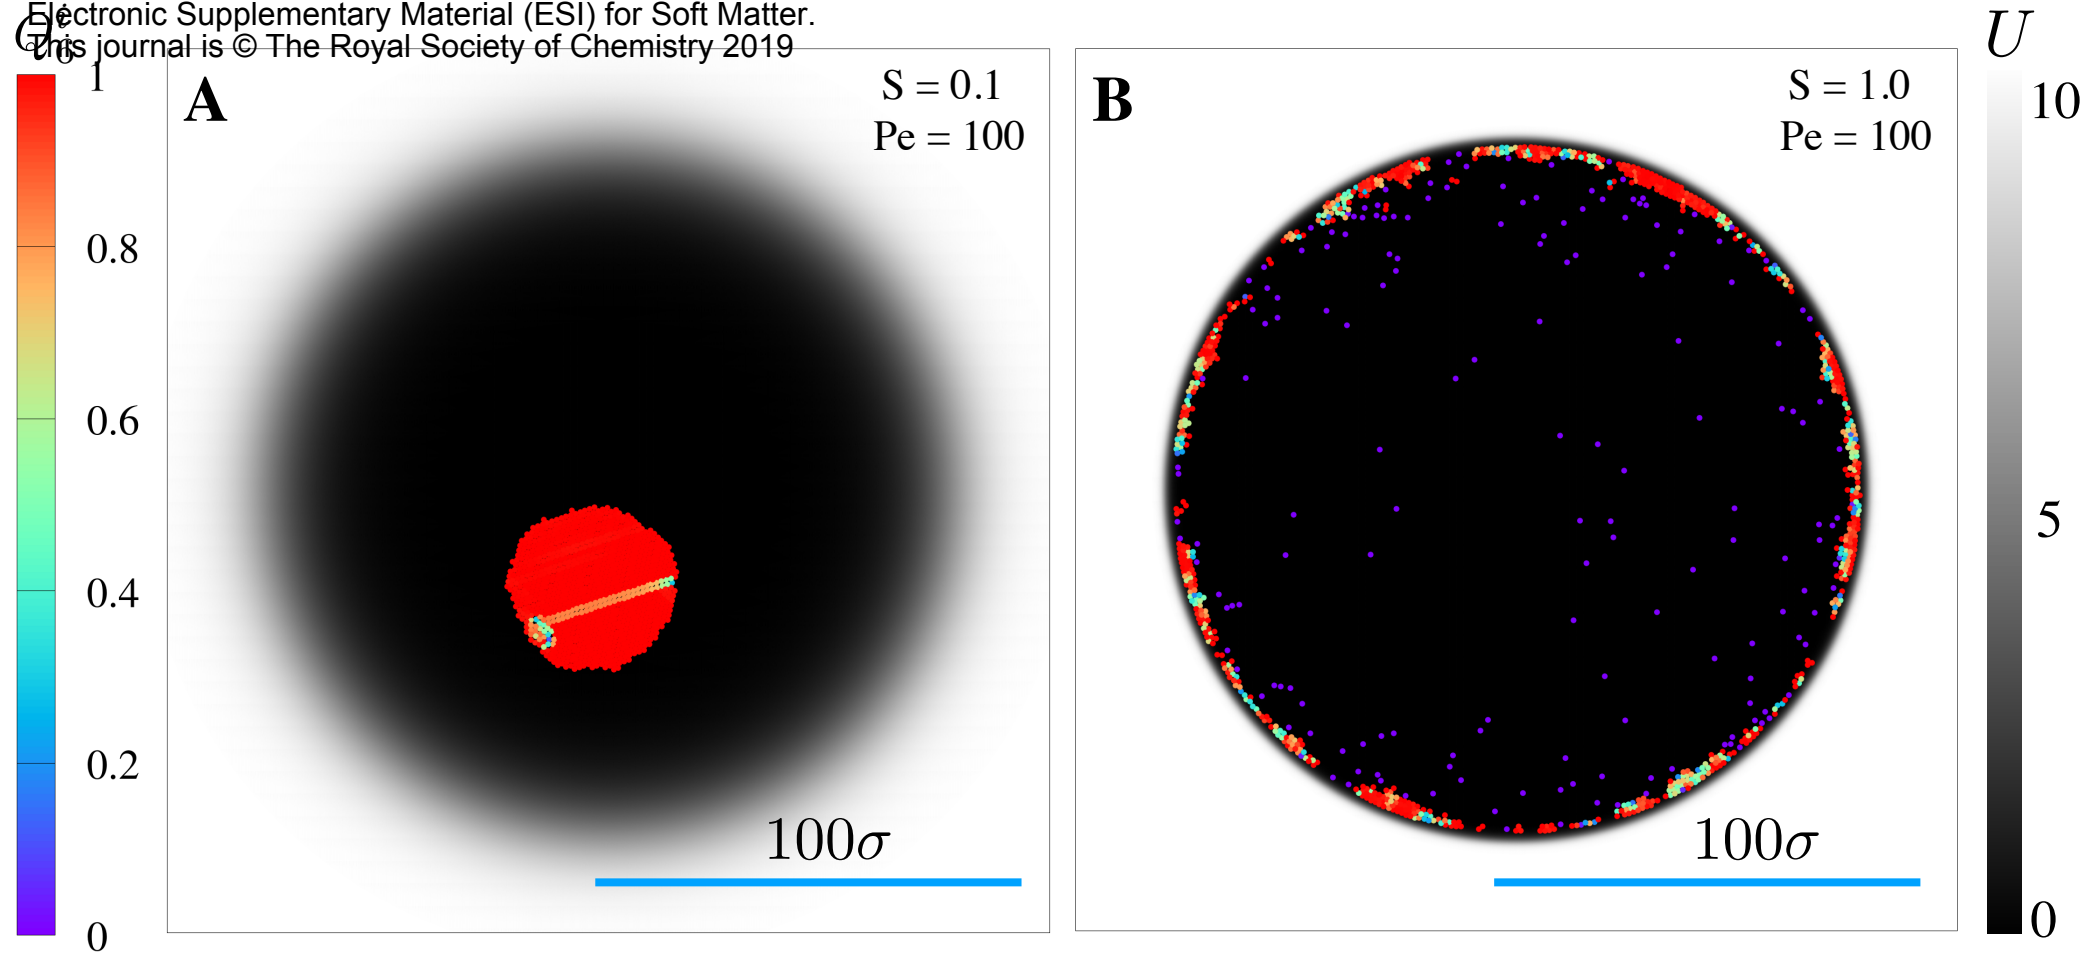

Supplement: c9sm01691k10.pdf [file c9sm01691k10.pdf]
